# Supplementary material for: LymPHOS 2.0: an update of a phosphosite database of primary human T cells
Source: PubMed Central journal article supplement (PMC4691341; doi:10.1093/database/bav115), 2015-12-23

### **Supplementary Information Figure 1 (SI Figure1).**

Complete schema of LymPHOS2 database showing all tables and fields. Information in the database is arranged in five main groups of tables/classes:

**Red** and **Orange**: Main experimental data obtained by mass spectrometry and resulting from multiple proteomics search engines and data integration by the Integrator program.

**Green**: Protein data associated with the experimental data.

**Yellow**: Quantitative analysis data related to the experimental data, obtained after the statistical treatment and processing of the quantitative experimental data by the PQuantifier program.

**Blue**: Description of experiments, experimental groups and experimental procedures.

**Gray**: Accessory tables/classes related to the database management.

Updates from LymPHOS (Ovelleiro, D. et al. (2009) *Proteomics*, 9, 3741-3751):

All accessory tables are of new creation to facilitate the internal control (*lymphos\_events*, *lymphos\_version*) and management (*lymphos\_users*) of the database.

The database core has new tables with quantitative information:

- *lymphos\_dataquant*

Quantitative data for each spectrum in each experiment.

- *lymphos\_quantpepexpond*

Statistics parameters of the quantitative measurements, for each peptide in each condition.

Includes *t*-test outcome on the evaluation of a change, as well as the *p*-value and the adjusted *p*-value provided by DanteR analysis.

Former *phosphosites* table is now included in table *lymphos\_data*.

Former *conditions* table is now extended in three new tables:

- *lymphos\_experiments*

Basic experimental data, with a record for each experiment.

- *lymphos\_expgroup*

The experimental group table, or conditions table, to group closely related experiments.

- *lymphos\_miapes*

For the experimental information according to HUPO-PSI MIAPE guidelines.

Experimental Design

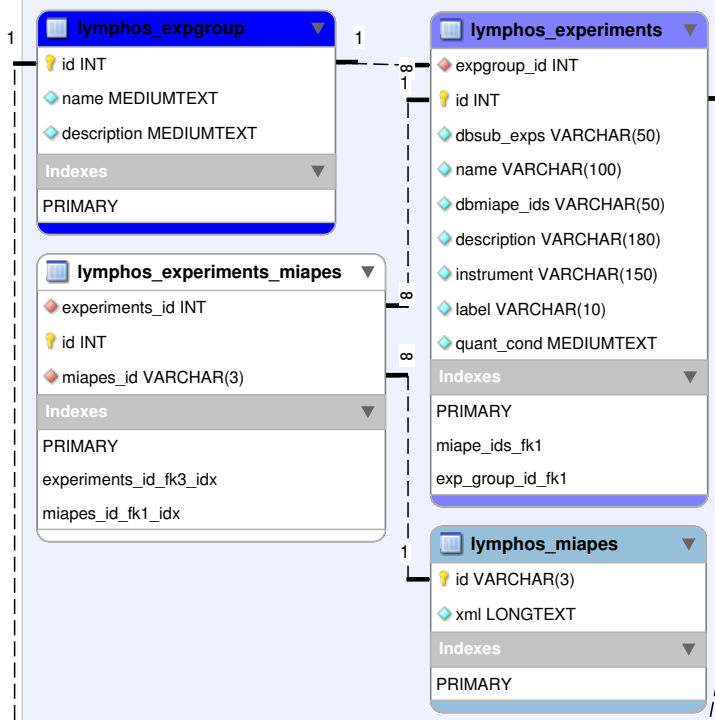

Main Experimental Data

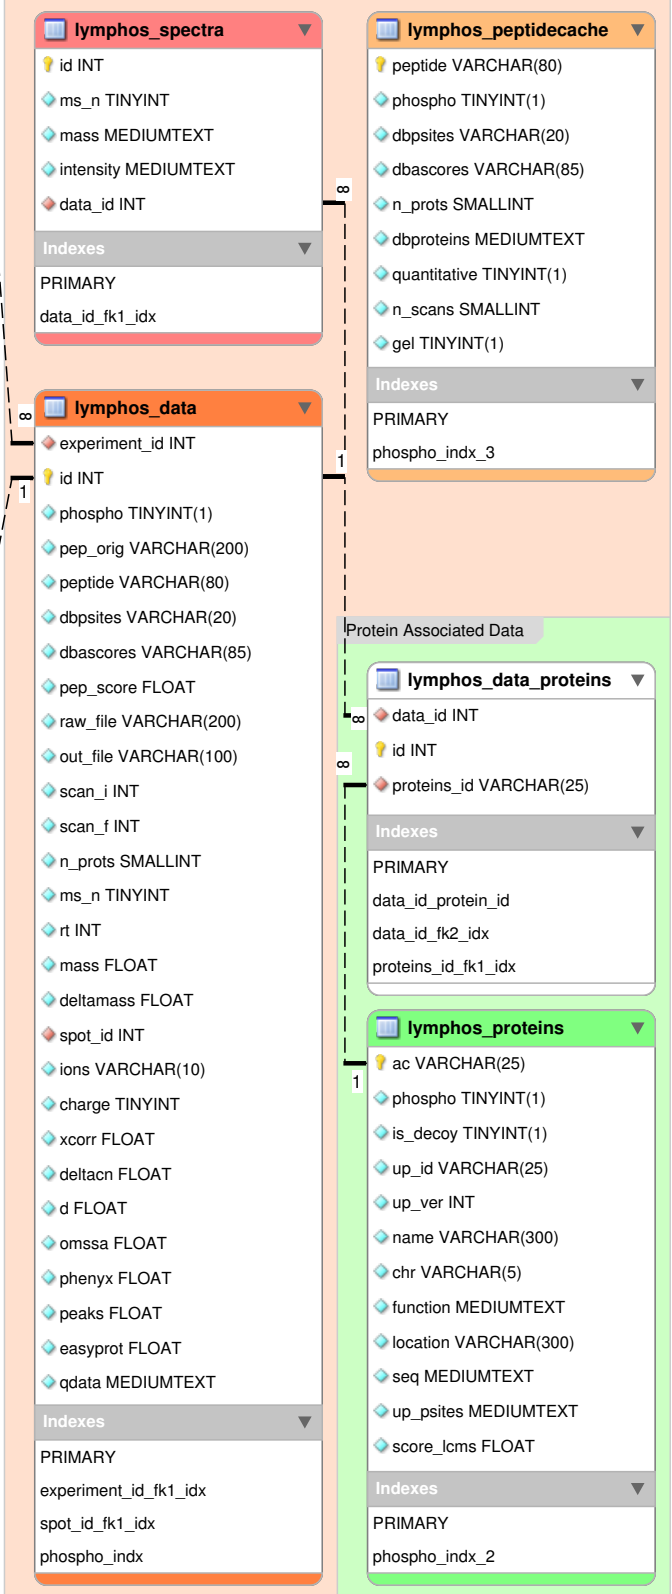

Quantitative Analysis Data

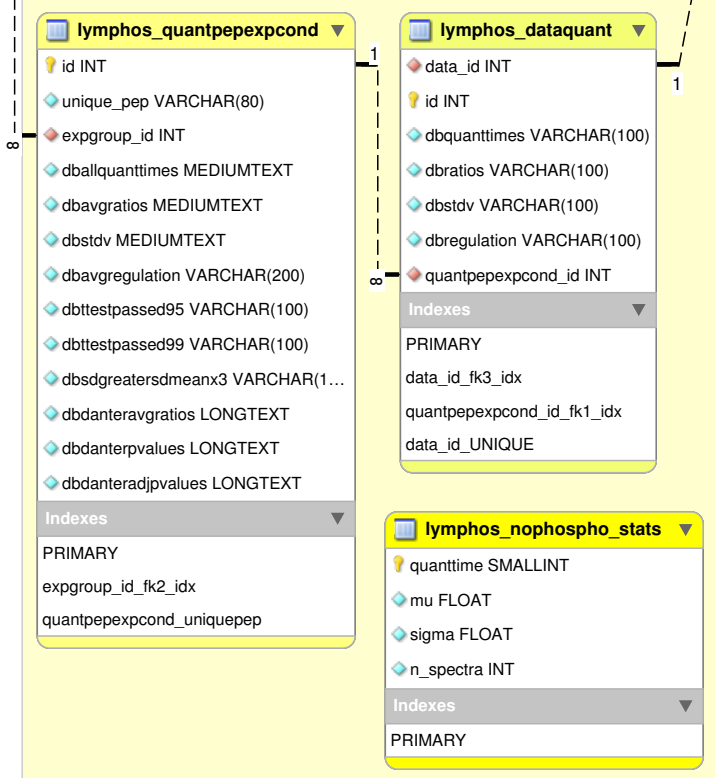

Database related

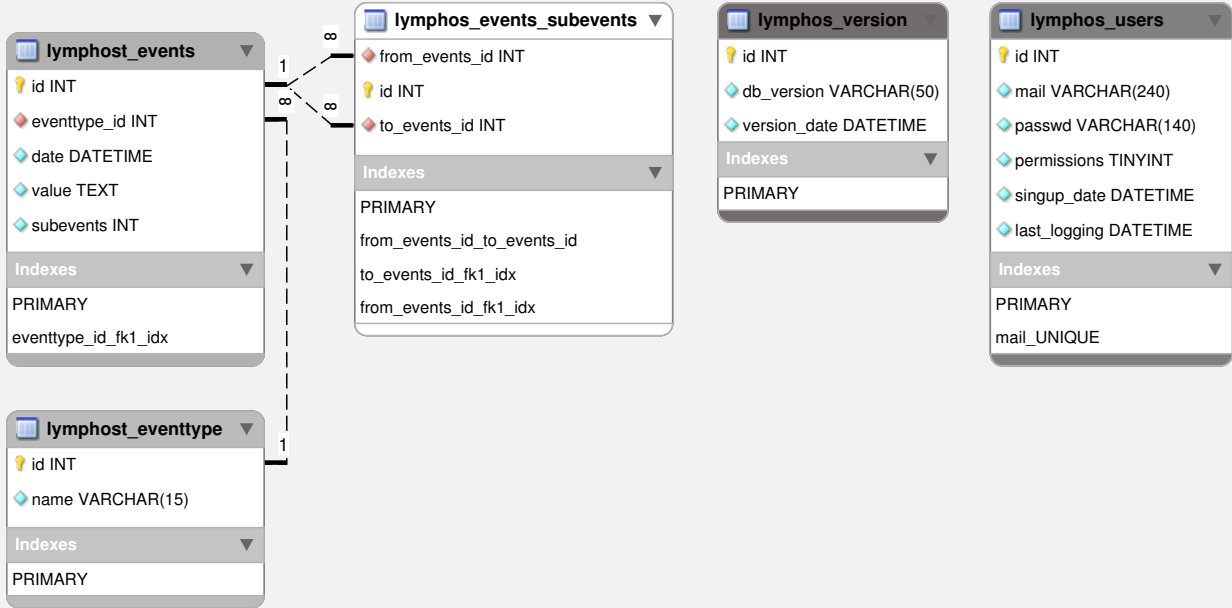

Supplement: supp_bav115_SI_Fig1_Rev1.pdf [file supp_bav115_SI_Fig1_Rev1.pdf]
